# Supplementary material for: Characteristics of solar radiation at Xiaotang, in the northern marginal zone of the Taklimakan Desert
Source: PeerJ. 2021 Nov 12;9:e12373. doi: 10.7717/peerj.12373 (PMC8592049; doi:10.7717/peerj.12373)
Supplement: Supplemental Information 1 — 2018 solar radiation data from Xiaotang Station in the Taklimakan Desert. [file peerj-09-12373-s001.xlsx]

## Sheet: Sheet1
year	month	day	hour	Direct Radiation	Scattered Radiation	Total Radiation
2018	1	1	0	0	0	0
2018	1	1	1	0	0	0
2018	1	1	2	0	0	0
2018	1	1	3	0	0	0
2018	1	1	4	0	0	0
2018	1	1	5	0	0	0
2018	1	1	6	0	0	0
2018	1	1	7	0	0	0
2018	1	1	8	0.132178	8.0953	8.59454
2018	1	1	9	1.75862	75.9529	78.2527
2018	1	1	10	15.6695	180.13	195.304
2018	1	1	11	35.4809	196.861	231.711
2018	1	1	12	68.7399	259.121	328.834
2018	1	1	13	30.5613	276.978	310.605
2018	1	1	14	42.9785	234.442	285.387
2018	1	1	15	21.1346	163.008	191.165
2018	1	1	16	3.78973	114.279	124.139
2018	1	1	17	0	14.5679	15.2663
2018	1	1	18	0	0	0
2018	1	1	19	0	0	0
2018	1	1	20	0	0	0
2018	1	1	21	0	0	0
2018	1	1	22	0	0	0
2018	1	1	23	0	0	0
2018	1	2	0	0	0	0
2018	1	2	1	0	0	0
2018	1	2	2	0	0	0
2018	1	2	3	0	0	0
2018	1	2	4	0	0	0
2018	1	2	5	0	0	0
2018	1	2	6	0	0	0
2018	1	2	7	0	0	0
2018	1	2	8	0.272145	2.71421	3.3925
2018	1	2	9	59.6271	43.6885	102.242
2018	1	2	10	227.197	79.1133	286.041
2018	1	2	11	311.58	89.408	388.486
2018	1	2	12	334.692	103.752	445.419
2018	1	2	13	320.304	99.6802	447.741
2018	1	2	14	251.198	98.8912	393.507
2018	1	2	15	144.415	90.8341	288.961
2018	1	2	16	34.8585	64.3522	145.889
2018	1	2	17	0	14.0711	20.3932
2018	1	2	18	0	0	0
2018	1	2	19	0	0	0
2018	1	2	20	0	0	0
2018	1	2	21	0	0	0
2018	1	2	22	0	0	0
2018	1	2	23	0	0	0
2018	1	3	0	0	0	0
2018	1	3	1	0	0	0
2018	1	3	2	0	0	0
2018	1	3	3	0	0	0
2018	1	3	4	0	0	0
2018	1	3	5	0	0	0
2018	1	3	6	0	0	0
2018	1	3	7	0	0	0
2018	1	3	8	1.35471	9.72843	11.6547
2018	1	3	9	45.3567	76.5959	118.581
2018	1	3	10	136.17	131.04	255.938
2018	1	3	11	195.336	171.35	359.311
2018	1	3	12	233.664	181.029	420.298
2018	1	3	13	227.938	180.554	428.416
2018	1	3	14	172.675	173.107	375.469
2018	1	3	15	99.5546	139.828	276.717
2018	1	3	16	23.2382	86.7434	141.273
2018	1	3	17	0	15.8989	19.7142
2018	1	3	18	0	0	0
2018	1	3	19	0	0	0
2018	1	3	20	0	0	0
2018	1	3	21	0	0	0
2018	1	3	22	0	0	0
2018	1	3	23	0	0	0
2018	1	4	0	0	0	0
2018	1	4	1	0	0	0
2018	1	4	2	0	0	0
2018	1	4	3	0	0	0
2018	1	4	4	0	0	0
2018	1	4	5	0	0	0
2018	1	4	6	0	0	0
2018	1	4	7	0	0	0
2018	1	4	8	0.140802	3.15453	3.72814
2018	1	4	9	13.1098	52.0735	65.771
2018	1	4	10	46.7572	118.362	162.215
2018	1	4	11	56.7506	203.675	260.039
2018	1	4	12	48.7932	236.454	287.859
2018	1	4	13	39.4222	245.726	290.045
2018	1	4	14	66.6568	242.785	321.389
2018	1	4	15	36.4644	189.977	242.345
2018	1	4	16	10.3445	125.857	149.924
2018	1	4	17	0	31.0189	33.9584
2018	1	4	18	0	0	0
2018	1	4	19	0	0	0
2018	1	4	20	0	0	0
2018	1	4	21	0	0	0
2018	1	4	22	0	0	0
2018	1	4	23	0	0	0
2018	1	5	0	0	0	0
2018	1	5	1	0	0	0
2018	1	5	2	0	0	0
2018	1	5	3	0	0	0
2018	1	5	4	0	0	0
2018	1	5	5	0	0	0
2018	1	5	6	0	0	0
2018	1	5	7	0	0	0
2018	1	5	8	0.234581	8.6145	9.36408
2018	1	5	9	13.3353	59.5705	71.9069
2018	1	5	10	70.3105	99.1563	166.811
2018	1	5	11	219.065	153.667	365.722
2018	1	5	12	260.553	167.666	435.501
2018	1	5	13	219.868	188.69	429.883
2018	1	5	14	106.619	216.044	344.074
2018	1	5	15	37.3427	178.921	232.026
2018	1	5	16	5.44799	101.761	115.596
2018	1	5	17	0	15.2549	16.127
2018	1	5	18	0	0	0
2018	1	5	19	0	0	0
2018	1	5	20	0	0	0
2018	1	5	21	0	0	0
2018	1	5	22	0	0	0
2018	1	5	23	0	0	0
2018	1	6	0	0	0	0
2018	1	6	1	0	0	0
2018	1	6	2	0	0	0
2018	1	6	3	0	0	0
2018	1	6	4	0	0	0
2018	1	6	5	0	0	0
2018	1	6	6	0	0	0
2018	1	6	7	0	0	0
2018	1	6	8	0.265315	8.0947	8.89093
2018	1	6	9	21.0565	83.3703	103.641
2018	1	6	10	92.8068	157.548	241.607
2018	1	6	11	171.251	196.651	356.238
2018	1	6	12	204.374	216.828	419.82
2018	1	6	13	203.466	214.75	430.113
2018	1	6	14	159.451	194.968	378.011
2018	1	6	15	79.6798	163.129	269.103
2018	1	6	16	14.7803	99.3555	131.203
2018	1	6	17	0	18.0918	19.4403
2018	1	6	18	0	0	0
2018	1	6	19	0	0	0
2018	1	6	20	0	0	0
2018	1	6	21	0	0	0
2018	1	6	22	0	0	0
2018	1	6	23	0	0	0
2018	1	7	0	0	0	0
2018	1	7	1	0	0	0
2018	1	7	2	0	0	0
2018	1	7	3	0	0	0
2018	1	7	4	0	0	0
2018	1	7	5	0	0	0
2018	1	7	6	0	0	0
2018	1	7	7	0	0	0
2018	1	7	8	1.3231	9.10947	10.6842
2018	1	7	9	59.1716	72.0214	117.595
2018	1	7	10	163.581	122.405	263.386
2018	1	7	11	242.252	153.019	379.535
2018	1	7	12	282.72	164.256	446.166
2018	1	7	13	277.121	160.209	454.279
2018	1	7	14	224.505	143.998	402.781
2018	1	7	15	133.487	117.82	294.856
2018	1	7	16	34.1846	78.3182	149.852
2018	1	7	17	0	17.426	21.9113
2018	1	7	18	0	0	0
2018	1	7	19	0	0	0
2018	1	7	20	0	0	0
2018	1	7	21	0	0	0
2018	1	7	22	0	0	0
2018	1	7	23	0	0	0
2018	1	8	0	0	0	0
2018	1	8	1	0	0	0
2018	1	8	2	0	0	0
2018	1	8	3	0	0	0
2018	1	8	4	0	0	0
2018	1	8	5	0	0	0
2018	1	8	6	0	0	0
2018	1	8	7	0	0	0
2018	1	8	8	0.600588	9.42476	10.4118
2018	1	8	9	39.649	80.1959	111.99
2018	1	8	10	134.503	140.801	257.759
2018	1	8	11	212.786	176.243	375.906
2018	1	8	12	248.482	191.105	439.417
2018	1	8	13	236.814	192.924	445.408
2018	1	8	14	184.592	178.69	392.658
2018	1	8	15	105.144	145.358	286.397
2018	1	8	16	24.7036	91.6221	143.963
2018	1	8	17	0	18.9501	22.3639
2018	1	8	18	0	0	0
2018	1	8	19	0	0	0
2018	1	8	20	0	0	0
2018	1	8	21	0	0	0
2018	1	8	22	0	0	0
2018	1	8	23	0	0	0
2018	1	9	0	0	0	0
2018	1	9	1	0	0	0
2018	1	9	2	0	0	0
2018	1	9	3	0	0	0
2018	1	9	4	0	0	0
2018	1	9	5	0	0	0
2018	1	9	6	0	0	0
2018	1	9	7	0	0	0
2018	1	9	8	0.979879	9.97832	11.3159
2018	1	9	9	47.4283	73.9096	111.57
2018	1	9	10	149.934	126.674	257.647
2018	1	9	11	235.611	155.183	377.619
2018	1	9	12	276.143	167.252	444.395
2018	1	9	13	266.128	166.328	451.243
2018	1	9	14	204.011	157.192	394.411
2018	1	9	15	115.749	133.674	285.242
2018	1	9	16	28.4838	90.3765	148.244
2018	1	9	17	0	28.1555	32.1639
2018	1	9	18	0	0	0
2018	1	9	19	0	0	0
2018	1	9	20	0	0	0
2018	1	9	21	0	0	0
2018	1	9	22	0	0	0
2018	1	9	23	0	0	0
2018	1	10	0	0	0	0
2018	1	10	1	0	0	0
2018	1	10	2	0	0	0
2018	1	10	3	0	0	0
2018	1	10	4	0	0	0
2018	1	10	5	0	0	0
2018	1	10	6	0	0	0
2018	1	10	7	0	0	0
2018	1	10	8	1.58501	9.43079	11.0368
2018	1	10	9	63.0348	70.6652	117.42
2018	1	10	10	175.915	116.535	265.345
2018	1	10	11	258.391	144.183	382.099
2018	1	10	12	297.239	155.145	447.531
2018	1	10	13	289.34	152.443	456.007
2018	1	10	14	234.169	138.08	404.245
2018	1	10	15	138.817	116.562	298.423
2018	1	10	16	37.1364	80.1376	154.724
2018	1	10	17	0	20.79	26.8605
2018	1	10	18	0	0	0
2018	1	10	19	0	0	0
2018	1	10	20	0	0	0
2018	1	10	21	0	0	0
2018	1	10	22	0	0	0
2018	1	10	23	0	0	0
2018	1	11	0	0	0	0
2018	1	11	1	0	0	0
2018	1	11	2	0	0	0
2018	1	11	3	0	0	0
2018	1	11	4	0	0	0
2018	1	11	5	0	0	0
2018	1	11	6	0	0	0
2018	1	11	7	0	0	0
2018	1	11	8	2.82356	9.45442	11.8075
2018	1	11	9	81.1094	64.7853	124.061
2018	1	11	10	209.107	101.694	277.897
2018	1	11	11	303.612	118.373	397.569
2018	1	11	12	343.575	128.163	465.012
2018	1	11	13	328.925	128.971	473.189
2018	1	11	14	261.441	123.74	420.972
2018	1	11	15	157.64	107.212	314.027
2018	1	11	16	45.0975	75.767	165.696
2018	1	11	17	0	20.9413	29.7451
2018	1	11	18	0	0	0
2018	1	11	19	0	0	0
2018	1	11	20	0	0	0
2018	1	11	21	0	0	0
2018	1	11	22	0	0	0
2018	1	11	23	0	0	0
2018	1	12	0	0	0	0
2018	1	12	1	0	0	0
2018	1	12	2	0	0	0
2018	1	12	3	0	0	0
2018	1	12	4	0	0	0
2018	1	12	5	0	0	0
2018	1	12	6	0	0	0
2018	1	12	7	0	0	0
2018	1	12	8	4.12531	9.48163	12.6674
2018	1	12	9	95.5739	65.0847	134.002
2018	1	12	10	211.09	104.757	282.379
2018	1	12	11	318.151	108.206	400.709
2018	1	12	12	360.195	120.814	474
2018	1	12	13	339.805	118.421	474.614
2018	1	12	14	283.735	107.217	430.064
2018	1	12	15	177.279	92.14	324.605
2018	1	12	16	48.596	73.5498	169.133
2018	1	12	17	0	22.95	32.9393
2018	1	12	18	0	0	0
2018	1	12	19	0	0	0
2018	1	12	20	0	0	0
2018	1	12	21	0	0	0
2018	1	12	22	0	0	0
2018	1	12	23	0	0	0
2018	1	13	0	0	0	0
2018	1	13	1	0	0	0
2018	1	13	2	0	0	0
2018	1	13	3	0	0	0
2018	1	13	4	0	0	0
2018	1	13	5	0	0	0
2018	1	13	6	0	0	0
2018	1	13	7	0	0	0
2018	1	13	8	0.187585	4.24656	4.7783
2018	1	13	9	39.9651	75.7312	107.413
2018	1	13	10	193.377	127.741	289.111
2018	1	13	11	290.63	126.466	393.078
2018	1	13	12	348.042	126.857	468.153
2018	1	13	13	344.383	118.787	480.002
2018	1	13	14	271.868	118.288	428.286
2018	1	13	15	164.596	103.729	320.027
2018	1	13	16	46.5578	79.0777	171.111
2018	1	13	17	0	23.7552	32.7167
2018	1	13	18	0	0	0
2018	1	13	19	0	0	0
2018	1	13	20	0	0	0
2018	1	13	21	0	0	0
2018	1	13	22	0	0	0
2018	1	13	23	0	0	0
2018	1	14	0	0	0	0
2018	1	14	1	0	0	0
2018	1	14	2	0	0	0
2018	1	14	3	0	0	0
2018	1	14	4	0	0	0
2018	1	14	5	0	0	0
2018	1	14	6	0	0	0
2018	1	14	7	0	0	0
2018	1	14	8	0.171828	6.908	7.53493
2018	1	14	9	0.376174	64.6328	65.7181
2018	1	14	10	35.888	141.068	175.143
2018	1	14	11	167.7	168.208	324.334
2018	1	14	12	301.064	139.2	435.964
2018	1	14	13	291.656	142.066	449.58
2018	1	14	14	221.751	140.138	395.685
2018	1	14	15	99.229	145.834	278.256
2018	1	14	16	27.2963	127.762	180.61
2018	1	14	17	0	33.1184	37.121
2018	1	14	18	0	0	0
2018	1	14	19	0	0	0
2018	1	14	20	0	0	0
2018	1	14	21	0	0	0
2018	1	14	22	0	0	0
2018	1	14	23	0	0	0
2018	1	15	0	0	0	0
2018	1	15	1	0	0	0
2018	1	15	2	0	0	0
2018	1	15	3	0	0	0
2018	1	15	4	0	0	0
2018	1	15	5	0	0	0
2018	1	15	6	0	0	0
2018	1	15	7	0	0	0
2018	1	15	8	2.68507	13.0573	15.3285
2018	1	15	9	44.1477	87.3263	117.237
2018	1	15	10	69.8996	181.278	238.456
2018	1	15	11	73.1974	169.252	240.281
2018	1	15	12	293.461	156.922	446.23
2018	1	15	13	249.226	176.735	439.986
2018	1	15	14	218.04	166.785	417.399
2018	1	15	15	148.687	142.235	338.521
2018	1	15	16	42.6926	82.7401	164.887
2018	1	15	17	0	26.9856	39.4656
2018	1	15	18	0	0	0
2018	1	15	19	0	0	0
2018	1	15	20	0	0	0
2018	1	15	21	0	0	0
2018	1	15	22	0	0	0
2018	1	15	23	0	0	0
2018	1	16	0	0	0	0
2018	1	16	1	0	0	0
2018	1	16	2	0	0	0
2018	1	16	3	0	0	0
2018	1	16	4	0	0	0
2018	1	16	5	0	0	0
2018	1	16	6	0	0	0
2018	1	16	7	0	0	0
2018	1	16	8	0.179947	7.26105	7.82381
2018	1	16	9	5.52391	80.5195	85.3299
2018	1	16	10	65.3638	150.928	207.304
2018	1	16	11	75.2281	215.704	285.86
2018	1	16	12	125.196	262.936	387.541
2018	1	16	13	63.1394	269.261	336.735
2018	1	16	14	44.4841	265.783	317.931
2018	1	16	15	12.7147	196.654	214.036
2018	1	16	16	0.941117	108.812	111.276
2018	1	16	17	0	34.8309	35.8446
2018	1	16	18	0	0	0
2018	1	16	19	0	0	0
2018	1	16	20	0	0	0
2018	1	16	21	0	0	0
2018	1	16	22	0	0	0
2018	1	16	23	0	0	0
2018	1	17	0	0	0	0
2018	1	17	1	0	0	0
2018	1	17	2	0	0	0
2018	1	17	3	0	0	0
2018	1	17	4	0	0	0
2018	1	17	5	0	0	0
2018	1	17	6	0	0	0
2018	1	17	7	0	0	0
2018	1	17	8	0.256407	8.37932	9.08292
2018	1	17	9	3.70426	77.2191	80.6934
2018	1	17	10	3.689	149.969	154.562
2018	1	17	11	5.60195	197.7	204.383
2018	1	17	12	41.2055	238.527	281.389
2018	1	17	13	245.117	173.365	433.504
2018	1	17	14	161.412	192.771	380.757
2018	1	17	15	66.007	155.373	244.72
2018	1	17	16	4.84994	104.299	114.722
2018	1	17	17	0	22.487	22.624
2018	1	17	18	0	0	0
2018	1	17	19	0	0	0
2018	1	17	20	0	0	0
2018	1	17	21	0	0	0
2018	1	17	22	0	0	0
2018	1	17	23	0	0	0
2018	1	18	0	0	0	0
2018	1	18	1	0	0	0
2018	1	18	2	0	0	0
2018	1	18	3	0	0	0
2018	1	18	4	0	0	0
2018	1	18	5	0	0	0
2018	1	18	6	0	0	0
2018	1	18	7	0	0	0
2018	1	18	8	3.72237	16.4192	18.7489
2018	1	18	9	14.1795	98.6537	109.149
2018	1	18	10	2.83069	96.6351	98.8101
2018	1	18	11	0.906172	145.941	146.997
2018	1	18	12	1.94427	189.012	191.093
2018	1	18	13	0.934413	162.904	163.782
2018	1	18	14	1.07591	147.694	148.935
2018	1	18	15	0.616243	127.261	127.902
2018	1	18	16	0.24276	59.9658	60.4491
2018	1	18	17	0	23.0601	23.5254
2018	1	18	18	0	0	0
2018	1	18	19	0	0	0
2018	1	18	20	0	0	0
2018	1	18	21	0	0	0
2018	1	18	22	0	0	0
2018	1	18	23	0	0	0
2018	1	19	0	0	0	0
2018	1	19	1	0	0	0
2018	1	19	2	0	0	0
2018	1	19	3	0	0	0
2018	1	19	4	0	0	0
2018	1	19	5	0	0	0
2018	1	19	6	0	0	0
2018	1	19	7	0	0	0
2018	1	19	8	3.02271	17.0357	19.1202
2018	1	19	9	46.8623	85.6908	119.723
2018	1	19	10	112.526	147.329	243.253
2018	1	19	11	175.805	197.708	356.984
2018	1	19	12	117.275	209.435	324.956
2018	1	19	13	240.112	218.438	469.514
2018	1	19	14	185.141	182.559	392.217
2018	1	19	15	88.647	160.938	278.428
2018	1	19	16	22.2394	115.861	159.829
2018	1	19	17	0	39.1462	41.1212
2018	1	19	18	0	0	0
2018	1	19	19	0	0	0
2018	1	19	20	0	0	0
2018	1	19	21	0	0	0
2018	1	19	22	0	0	0
2018	1	19	23	0	0	0
2018	1	20	0	0	0	0
2018	1	20	1	0	0	0
2018	1	20	2	0	0	0
2018	1	20	3	0	0	0
2018	1	20	4	0	0	0
2018	1	20	5	0	0	0
2018	1	20	6	0	0	0
2018	1	20	7	0	0	0
2018	1	20	8	2.73648	10.5784	12.6138
2018	1	20	9	77.3104	77.6843	133.489
2018	1	20	10	181.744	127.197	278.498
2018	1	20	11	246.074	165.449	389.437
2018	1	20	12	263.701	195.156	453.045
2018	1	20	13	256.698	195.228	464.081
2018	1	20	14	220.016	172.43	424
2018	1	20	15	131.405	149.239	322.225
2018	1	20	16	47.3083	97.5604	187.438
2018	1	20	17	0	33.3308	45.8383
2018	1	20	18	0	0	0
2018	1	20	19	0	0	0
2018	1	20	20	0	0	0
2018	1	20	21	0	0	0
2018	1	20	22	0	0	0
2018	1	20	23	0	0	0
2018	1	21	0	0	0	0
2018	1	21	1	0	0	0
2018	1	21	2	0	0	0
2018	1	21	3	0	0	0
2018	1	21	4	0	0	0
2018	1	21	5	0	0	0
2018	1	21	6	0	0	0
2018	1	21	7	0	0	0
2018	1	21	8	3.39293	12.8999	15.3946
2018	1	21	9	80.6608	76.8551	135.885
2018	1	21	10	198.082	122.15	288.639
2018	1	21	11	285.725	148.345	411.298
2018	1	21	12	325.715	161.25	482.019
2018	1	21	13	311.883	164.927	493.694
2018	1	21	14	250.228	157.778	445.271
2018	1	21	15	153.788	137.283	340.605
2018	1	21	16	49.8641	99.271	194.971
2018	1	21	17	0	35.4496	47.8021
2018	1	21	18	0	0	0
2018	1	21	19	0	0	0
2018	1	21	20	0	0	0
2018	1	21	21	0	0	0
2018	1	21	22	0	0	0
2018	1	21	23	0	0	0
2018	1	22	0	0	0	0
2018	1	22	1	0	0	0
2018	1	22	2	0	0	0
2018	1	22	3	0	0	0
2018	1	22	4	0	0	0
2018	1	22	5	0	0	0
2018	1	22	6	0	0	0
2018	1	22	7	0	0	0
2018	1	22	8	2.84855	14.5116	16.4308
2018	1	22	9	71.3498	80.8766	134.316
2018	1	22	10	193.948	124.485	288.294
2018	1	22	11	287.168	147.896	412.728
2018	1	22	12	335.53	154.591	485.378
2018	1	22	13	335.906	146.522	501.115
2018	1	22	14	275.549	137.735	454.743
2018	1	22	15	174.842	120.378	351.8
2018	1	22	16	60.5345	89.8805	204.605
2018	1	22	17	0	34.7455	52.8108
2018	1	22	18	0	0	0
2018	1	22	19	0	0	0
2018	1	22	20	0	0	0
2018	1	22	21	0	0	0
2018	1	22	22	0	0	0
2018	1	22	23	0	0	0
2018	1	23	0	0	0	0
2018	1	23	1	0	0	0
2018	1	23	2	0	0	0
2018	1	23	3	0	0	0
2018	1	23	4	0	0	0
2018	1	23	5	0	0	0
2018	1	23	6	0	0	0
2018	1	23	7	0	0	0
2018	1	23	8	7.51743	18.2706	23.087
2018	1	23	9	118.644	84.6628	170.746
2018	1	23	10	223.446	173.205	363.344
2018	1	23	11	224.597	250.838	457.426
2018	1	23	12	175.15	295.972	469.493
2018	1	23	13	137.065	292.312	437.584
2018	1	23	14	64.6133	243.259	318.573
2018	1	23	15	45.6115	220.801	282.851
2018	1	23	16	6.01645	123.032	135.53
2018	1	23	17	0	33.8963	34.0598
2018	1	23	18	0	0	0
2018	1	23	19	0	0	0
2018	1	23	20	0	0	0
2018	1	23	21	0	0	0
2018	1	23	22	0	0	0
2018	1	23	23	0	0	0
2018	1	24	0	0	0	0
2018	1	24	1	0	0	0
2018	1	24	2	0	0	0
2018	1	24	3	0	0	0
2018	1	24	4	0	0	0
2018	1	24	5	0	0	0
2018	1	24	6	0	0	0
2018	1	24	7	0	0	0
2018	1	24	8	0.224295	8.87415	8.93973
2018	1	24	9	1.02349	84.2999	85.3303
2018	1	24	10	73.3825	159.464	227.539
2018	1	24	11	127.081	228.128	346.804
2018	1	24	12	139.73	272.845	411.185
2018	1	24	13	195.501	295.283	503.46
2018	1	24	14	218.549	246.538	499.907
2018	1	24	15	160.562	143.401	357.354
2018	1	24	16	56.8707	99.8761	207.388
2018	1	24	17	0	39.5637	58.4868
2018	1	24	18	0	0	0
2018	1	24	19	0	0	0
2018	1	24	20	0	0	0
2018	1	24	21	0	0	0
2018	1	24	22	0	0	0
2018	1	24	23	0	0	0
2018	1	25	0	0	0	0
2018	1	25	1	0	0	0
2018	1	25	2	0	0	0
2018	1	25	3	0	0	0
2018	1	25	4	0	0	0
2018	1	25	5	0	0	0
2018	1	25	6	0	0	0
2018	1	25	7	0	0	0
2018	1	25	8	3.3769	20.2868	24.5485
2018	1	25	9	47.7805	93.9585	147.429
2018	1	25	10	109.763	173.891	301.013
2018	1	25	11	208.391	200.779	413.757
2018	1	25	12	339.415	162.638	501.588
2018	1	25	13	332.336	160.9	515.822
2018	1	25	14	265.652	155.421	464.859
2018	1	25	15	164.172	138.927	358.126
2018	1	25	16	61.4574	97.6744	213.275
2018	1	25	17	0	39.748	60.5595
2018	1	25	18	0	0	0
2018	1	25	19	0	0	0
2018	1	25	20	0	0	0
2018	1	25	21	0	0	0
2018	1	25	22	0	0	0
2018	1	25	23	0	0	0
2018	1	26	0	0	0	0
2018	1	26	1	0	0	0
2018	1	26	2	0	0	0
2018	1	26	3	0	0	0
2018	1	26	4	0	0	0
2018	1	26	5	0	0	0
2018	1	26	6	0	0	0
2018	1	26	7	0	0	0
2018	1	26	8	0.555864	14.0602	14.6798
2018	1	26	9	64.1616	90.4027	142.953
2018	1	26	10	192.584	139.403	304.31
2018	1	26	11	279.433	167.658	429.024
2018	1	26	12	312.354	182.925	494.916
2018	1	26	13	295.11	187.995	503.571
2018	1	26	14	232.85	183.93	455.981
2018	1	26	15	125.499	179.043	347.265
2018	1	26	16	43.504	123.409	206.475
2018	1	26	17	0	48.5841	58.6897
2018	1	26	18	0	0	0
2018	1	26	19	0	0	0
2018	1	26	20	0	0	0
2018	1	26	21	0	0	0
2018	1	26	22	0	0	0
2018	1	26	23	0	0	0
2018	1	27	0	0	0	0
2018	1	27	1	0	0	0
2018	1	27	2	0	0	0
2018	1	27	3	0	0	0
2018	1	27	4	0	0	0
2018	1	27	5	0	0	0
2018	1	27	6	0	0	0
2018	1	27	7	0	0	0
2018	1	27	8	0.226441	10.1575	10.3473
2018	1	27	9	0.48928	50.1463	50.5718
2018	1	27	10	35.2566	138.224	170.951
2018	1	27	11	92.9415	205.258	293.222
2018	1	27	12	120.922	237.21	359.498
2018	1	27	13	135.302	287.615	434.203
2018	1	27	14	69.0906	274.569	357.232
2018	1	27	15	10.3241	207.622	222.698
2018	1	27	16	0.410082	91.5552	92.5534
2018	1	27	17	0	30.7974	31.2967
2018	1	27	18	0	0	0
2018	1	27	19	0	0	0
2018	1	27	20	0	0	0
2018	1	27	21	0	0	0
2018	1	27	22	0	0	0
2018	1	27	23	0	0	0
2018	1	28	0	0	0	0
2018	1	28	1	0	0	0
2018	1	28	2	0	0	0
2018	1	28	3	0	0	0
2018	1	28	4	0	0	0
2018	1	28	5	0	0	0
2018	1	28	6	0	0	0
2018	1	28	7	0	0	0
2018	1	28	8	0.233003	11.0287	11.169
2018	1	28	9	0.41926	68.579	69.033
2018	1	28	10	0.684538	105.116	105.658
2018	1	28	11	2.65462	195.922	198.565
2018	1	28	12	3.00275	221.029	223.917
2018	1	28	13	1.37799	189.628	190.813
2018	1	28	14	1.74416	195.92	197.832
2018	1	28	15	0.681774	136.49	137.417
2018	1	28	16	0.277611	62.0412	62.576
2018	1	28	17	0	14.1254	14.5695
2018	1	28	18	0	0	0
2018	1	28	19	0	0	0
2018	1	28	20	0	0	0
2018	1	28	21	0	0	0
2018	1	28	22	0	0	0
2018	1	28	23	0	0	0
2018	1	29	0	0	0	0
2018	1	29	1	0	0	0
2018	1	29	2	0	0	0
2018	1	29	3	0	0	0
2018	1	29	4	0	0	0
2018	1	29	5	0	0	0
2018	1	29	6	0	0	0
2018	1	29	7	0	0	0
2018	1	29	8	0.234341	12.492	12.6769
2018	1	29	9	0.45683	76.3922	77.2629
2018	1	29	10	4.41121	150.943	155.185
2018	1	29	11	96.1914	262.464	355.566
2018	1	29	12	192.47	293.417	487.299
2018	1	29	13	75.2136	349.522	431.211
2018	1	29	14	52.0941	317.735	381.637
2018	1	29	15	1.43069	113.726	118.251
2018	1	29	16	2.38975	87.9363	103.237
2018	1	29	17	0	50.7482	60.5253
2018	1	29	18	0	0	0
2018	1	29	19	0	0	0
2018	1	29	20	0	0	0
2018	1	29	21	0	0	0
2018	1	29	22	0	0	0
2018	1	29	23	0	0	0
2018	1	30	0	0	0	0
2018	1	30	1	0	0	0
2018	1	30	2	0	0	0
2018	1	30	3	0	0	0
2018	1	30	4	0	0	0
2018	1	30	5	0	0	0
2018	1	30	6	0	0	0
2018	1	30	7	0	0	0
2018	1	30	8	0.325518	19.3286	21.3879
2018	1	30	9	13.3549	114.379	167.026
2018	1	30	10	43.8131	179.279	318.087
2018	1	30	11	84.4395	236.762	529.008
2018	1	30	12	53.6159	223.886	616.07
2018	1	30	13	39.7624	214.643	601.052
2018	1	30	14	43.0859	247.892	459.349
2018	1	30	15	85.1131	215.344	351.99
2018	1	30	16	50.5275	130.355	228.612
2018	1	30	17	0	51.5646	60.6764
2018	1	30	18	0	0	0
2018	1	30	19	0	0	0
2018	1	30	20	0	0	0
2018	1	30	21	0	0	0
2018	1	30	22	0	0	0
2018	1	30	23	0	0	0
2018	1	31	0	0	0	0
2018	1	31	1	0	0	0
2018	1	31	2	0	0	0
2018	1	31	3	0	0	0
2018	1	31	4	0	0	0
2018	1	31	5	0	0	0
2018	1	31	6	0	0	0
2018	1	31	7	0	0	0
2018	1	31	8	4.2451	22.9771	27.6554
2018	1	31	9	63.7058	99.007	170.65
2018	1	31	10	180.183	149.123	341.476
2018	1	31	11	298.902	171.226	467.771
2018	1	31	12	352.874	167.446	541.078
2018	1	31	13	359.34	151.672	558.805
2018	1	31	14	301.588	140.091	512.117
2018	1	31	15	207.309	126.789	406.344
2018	1	31	16	85.704	100.926	252.68
2018	1	31	17	0	50.5016	84.0611
2018	1	31	18	0	0	0
2018	1	31	19	0	0	0
2018	1	31	20	0	0	0
2018	1	31	21	0	0	0
2018	1	31	22	0	0	0
2018	1	31	23	0	0	0
2018	2	1	0	0	0	0
2018	2	1	1	0	0	0
2018	2	1	2	0	0	0
2018	2	1	3	0	0	0
2018	2	1	4	0	0	0
2018	2	1	5	0	0	0
2018	2	1	6	0	0	0
2018	2	1	7	0	0	0
2018	2	1	8	0.221808	12.3479	12.9835
2018	2	1	9	0.405401	66.9011	68.6724
2018	2	1	10	0.663198	134.759	137.776
2018	2	1	11	2.27546	217.162	224.864
2018	2	1	12	29.6006	313.94	372.108
2018	2	1	13	25.6805	340.91	369.296
2018	2	1	14	99.9733	314.221	431.073
2018	2	1	15	68.3728	235.786	324.623
2018	2	1	16	24.3374	125.554	170.579
2018	2	1	17	0	58.3117	61.2007
2018	2	1	18	0	0	0
2018	2	1	19	0	0	0
2018	2	1	20	0	0	0
2018	2	1	21	0	0	0
2018	2	1	22	0	0	0
2018	2	1	23	0	0	0
2018	2	2	0	0	0	0
2018	2	2	1	0	0	0
2018	2	2	2	0	0	0
2018	2	2	3	0	0	0
2018	2	2	4	0	0	0
2018	2	2	5	0	0	0
2018	2	2	6	0	0	0
2018	2	2	7	0	0	0
2018	2	2	8	0.919667	26.8738	28.3183
2018	2	2	9	28.4568	114.474	155.632
2018	2	2	10	116.107	183.618	336.411
2018	2	2	11	245.772	219.127	456.306
2018	2	2	12	296.797	224.424	518.912
2018	2	2	13	300.287	216.817	536.537
2018	2	2	14	248.229	204.071	490.277
2018	2	2	15	163.361	172.34	385.349
2018	2	2	16	64.6967	127.074	240.811
2018	2	2	17	0	58.6508	79.004
2018	2	2	18	0	0	0.193765
2018	2	2	19	0	0	0
2018	2	2	20	0	0	0
2018	2	2	21	0	0	0
2018	2	2	22	0	0	0
2018	2	2	23	0	0	0
2018	2	3	0	0	0	0
2018	2	3	1	0	0	0
2018	2	3	2	0	0	0
2018	2	3	3	0	0	0
2018	2	3	4	0	0	0
2018	2	3	5	0	0	0
2018	2	3	6	0	0	0
2018	2	3	7	0	0	0
2018	2	3	8	0.456132	25.1346	25.7828
2018	2	3	9	13.8998	132.554	159.982
2018	2	3	10	50.0731	201.174	286.697
2018	2	3	11	235.616	224.852	460.948
2018	2	3	12	283.767	237.41	520.48
2018	2	3	13	287.337	230.355	536.675
2018	2	3	14	140.396	235.19	399.208
2018	2	3	15	14.8104	185.67	206.716
2018	2	3	16	0.956877	113.744	115.534
2018	2	3	17	0	71.7532	74.3491
2018	2	3	18	0	0	0
2018	2	3	19	0	0	0
2018	2	3	20	0	0	0
2018	2	3	21	0	0	0
2018	2	3	22	0	0	0
2018	2	3	23	0	0	0
2018	2	4	0	0	0	0
2018	2	4	1	0	0	0
2018	2	4	2	0	0	0
2018	2	4	3	0	0	0
2018	2	4	4	0	0	0
2018	2	4	5	0	0	0
2018	2	4	6	0	0	0
2018	2	4	7	0.00354283	0	0
2018	2	4	8	0.261886	17.943	18.401
2018	2	4	9	0.674311	94.2424	95.4386
2018	2	4	10	3.18473	208.694	212.856
2018	2	4	11	136.005	295	424.902
2018	2	4	12	225.971	283.783	508.901
2018	2	4	13	174.769	327.693	514.65
2018	2	4	14	175.262	271.896	473.949
2018	2	4	15	120.725	214.258	371.161
2018	2	4	16	48.7437	150.622	234.758
2018	2	4	17	0.225478	65.5666	82.7405
2018	2	4	18	0	0.433734	0.671707
2018	2	4	19	0	0	0
2018	2	4	20	0	0	0
2018	2	4	21	0	0	0
2018	2	4	22	0	0	0
2018	2	4	23	0	0	0
2018	2	5	0	0	0	0
2018	2	5	1	0	0	0
2018	2	5	2	0	0	0
2018	2	5	3	0	0	0
2018	2	5	4	0	0	0
2018	2	5	5	0	0	0
2018	2	5	6	0	0	0
2018	2	5	7	0.00859474	0	0
2018	2	5	8	0.445199	28.8643	29.7649
2018	2	5	9	20.0915	133.715	168.18
2018	2	5	10	116.677	192.801	356.351
2018	2	5	11	269.238	210.266	474.732
2018	2	5	12	329.89	210.907	540.388
2018	2	5	13	314.552	219.868	555.374
2018	2	5	14	253.263	212.66	505.447
2018	2	5	15	167.73	179.756	398.422
2018	2	5	16	67.9374	133.22	249.658
2018	2	5	17	0.829456	63.2859	88.3949
2018	2	5	18	0	1.76514	2.41525
2018	2	5	19	0	0	0
2018	2	5	20	0	0	0
2018	2	5	21	0	0	0
2018	2	5	22	0	0	0
2018	2	5	23	0	0	0
2018	2	6	0	0	0	0
2018	2	6	1	0	0	0
2018	2	6	2	0	0	0
2018	2	6	3	0	0	0
2018	2	6	4	0	0	0
2018	2	6	5	0	0	0
2018	2	6	6	0	0	0
2018	2	6	7	0.0140914	0	0
2018	2	6	8	0.259358	19.2357	19.7274
2018	2	6	9	34.297	165.06	194.661
2018	2	6	10	62.6446	297.443	351.637
2018	2	6	11	154.339	357.357	502.483
2018	2	6	12	201.734	346.619	550.166
2018	2	6	13	186.107	345.343	545.492
2018	2	6	14	22.9682	301.132	329.508
2018	2	6	15	1.10708	198.522	200.631
2018	2	6	16	0.45865	119.695	120.92
2018	2	6	17	0.0176801	46.6424	47.2577
2018	2	6	18	0	0	0
2018	2	6	19	0	0	0
2018	2	6	20	0	0	0
2018	2	6	21	0	0	0
2018	2	6	22	0	0	0
2018	2	6	23	0	0	0
2018	2	7	0	0	0	0
2018	2	7	1	0	0	0
2018	2	7	2	0	0	0
2018	2	7	3	0	0	0
2018	2	7	4	0	0	0
2018	2	7	5	0	0	0
2018	2	7	6	0	0	0
2018	2	7	7	0.0197221	0	0
2018	2	7	8	0.740222	28.8273	29.7351
2018	2	7	9	22.4065	121.766	142.038
2018	2	7	10	153.271	192.32	323.524
2018	2	7	11	275.746	236.905	494.81
2018	2	7	12	320.764	224.124	543.969
2018	2	7	13	293.474	238.874	551.498
2018	2	7	14	244.689	230.49	512.811
2018	2	7	15	147.426	194.618	387.745
2018	2	7	16	53.9242	152.37	244.619
2018	2	7	17	0.950434	71.1095	85.3739
2018	2	7	18	0	1.16242	1.35903
2018	2	7	19	0	0	0
2018	2	7	20	0	0	0
2018	2	7	21	0	0	0
2018	2	7	22	0	0	0
2018	2	7	23	0	0	0
2018	2	8	0	0	0	0
2018	2	8	1	0	0	0
2018	2	8	2	0	0	0
2018	2	8	3	0	0	0
2018	2	8	4	0	0	0
2018	2	8	5	0	0	0
2018	2	8	6	0	0	0
2018	2	8	7	0.0265058	0	0
2018	2	8	8	1.42328	25.5462	26.9709
2018	2	8	9	55.3206	135.969	177.593
2018	2	8	10	165.702	208.259	351.435
2018	2	8	11	264.352	248.841	499.445
2018	2	8	12	307.123	234.444	541.371
2018	2	8	13	287.164	287.139	595.428
2018	2	8	14	247.178	249.556	536.324
2018	2	8	15	183.269	178.639	421.639
2018	2	8	16	76.4571	137.521	268.439
2018	2	8	17	2.21206	70.0745	97.2714
2018	2	8	18	0	2.96559	3.39032
2018	2	8	19	0	0	0
2018	2	8	20	0	0	0
2018	2	8	21	0	0	0
2018	2	8	22	0	0	0
2018	2	8	23	0	0	0
2018	2	9	0	0	0	0
2018	2	9	1	0	0	0
2018	2	9	2	0	0	0
2018	2	9	3	0	0	0
2018	2	9	4	0	0	0
2018	2	9	5	0	0	0
2018	2	9	6	0	0	0
2018	2	9	7	0.0318972	0	0
2018	2	9	8	19.8393	30.7561	44.5277
2018	2	9	9	144.235	90.2601	202.166
2018	2	9	10	280.786	121.972	369.973
2018	2	9	11	376.315	138.729	500.326
2018	2	9	12	424.94	143.185	579.091
2018	2	9	13	418.133	139.908	597.763
2018	2	9	14	354.041	133.153	552.607
2018	2	9	15	247.617	119.404	448.755
2018	2	9	16	115.064	97.3894	294.099
2018	2	9	17	6.49106	57.686	117.273
2018	2	9	18	0	3.1073	4.26518
2018	2	9	19	0	0	0
2018	2	9	20	0	0	0
2018	2	9	21	0	0	0
2018	2	9	22	0	0	0
2018	2	9	23	0	0	0
2018	2	10	0	0	0	0
2018	2	10	1	0	0	0
2018	2	10	2	0	0	0
2018	2	10	3	0	0	0
2018	2	10	4	0	0	0
2018	2	10	5	0	0	0
2018	2	10	6	0	0	0
2018	2	10	7	0.0391797	0	0
2018	2	10	8	14.3667	33.0188	43.305
2018	2	10	9	121.137	103.313	198.048
2018	2	10	10	239.979	152.941	365.361
2018	2	10	11	332.214	180.069	499.389
2018	2	10	12	380.768	188.398	579.433
2018	2	10	13	366.035	192.531	593.635
2018	2	10	14	303.081	185.179	543.718
2018	2	10	15	210.476	159.374	439.153
2018	2	10	16	94.0595	124.684	284.691
2018	2	10	17	5.37907	68.1373	111.381
2018	2	10	18	0	3.81995	4.43079
2018	2	10	19	0	0	0
2018	2	10	20	0	0	0
2018	2	10	21	0	0	0
2018	2	10	22	0	0	0
2018	2	10	23	0	0	0
2018	2	11	0	0	0	0
2018	2	11	1	0	0	0
2018	2	11	2	0	0	0
2018	2	11	3	0	0	0
2018	2	11	4	0	0	0
2018	2	11	5	0	0	0
2018	2	11	6	0	0	0
2018	2	11	7	0.0468884	0	0
2018	2	11	8	15.6274	34.8847	46.5673
2018	2	11	9	125.142	102.341	201.712
2018	2	11	10	252.49	144.816	369.6
2018	2	11	11	349.198	166.046	502.715
2018	2	11	12	390.624	177.976	579.681
2018	2	11	13	375.796	182.173	594.137
2018	2	11	14	317.811	172.392	548.544
2018	2	11	15	217.464	171.395	460.411
2018	2	11	16	98.3849	122.21	288.389
2018	2	11	17	5.96717	63.0927	107.37
2018	2	11	18	0	3.44484	4.20867
2018	2	11	19	0	0	0
2018	2	11	20	0	0	0
2018	2	11	21	0	0	0
2018	2	11	22	0	0	0
2018	2	11	23	0	0	0
2018	2	12	0	0	0	0
2018	2	12	1	0	0	0
2018	2	12	2	0	0	0
2018	2	12	3	0	0	0
2018	2	12	4	0	0	0
2018	2	12	5	0	0	0
2018	2	12	6	0	0	0
2018	2	12	7	0.0548222	0	0
2018	2	12	8	18.6877	36.8655	50.2337
2018	2	12	9	125.099	106.584	204.726
2018	2	12	10	230.625	160.172	365.808
2018	2	12	11	319.17	191.912	499.848
2018	2	12	12	319.874	236.99	565.633
2018	2	12	13	295.659	219.032	542.884
2018	2	12	14	284.614	195.182	531.858
2018	2	12	15	213.117	160.47	442.669
2018	2	12	16	91.3975	125.191	279.803
2018	2	12	17	3.54178	66.5761	91.848
2018	2	12	18	0	4.82422	5.06047
2018	2	12	19	0	0	0
2018	2	12	20	0	0	0
2018	2	12	21	0	0	0
2018	2	12	22	0	0	0
2018	2	12	23	0	0	0
2018	2	13	0	0	0	0
2018	2	13	1	0	0	0
2018	2	13	2	0	0	0
2018	2	13	3	0	0	0
2018	2	13	4	0	0	0
2018	2	13	5	0	0	0
2018	2	13	6	0	0	0
2018	2	13	7	0.0561285	0	0
2018	2	13	8	0.285635	26.5166	27.1418
2018	2	13	9	1.10702	110.095	111.979
2018	2	13	10	4.05944	192.825	197.808
2018	2	13	11	86.0697	294.897	378.56
2018	2	13	12	178.456	306.807	492.738
2018	2	13	13	108.055	352.721	473.284
2018	2	13	14	109.18	288.863	420.45
2018	2	13	15	8.7474	245.824	259.134
2018	2	13	16	1.36011	156.382	159.563
2018	2	13	17	0.0967691	54.1293	54.7163
2018	2	13	18	0	4.72292	4.85422
2018	2	13	19	0	0	0
2018	2	13	20	0	0	0
2018	2	13	21	0	0	0
2018	2	13	22	0	0	0
2018	2	13	23	0	0	0
2018	2	14	0	0	0	0
2018	2	14	1	0	0	0
2018	2	14	2	0	0	0
2018	2	14	3	0	0	0
2018	2	14	4	0	0	0
2018	2	14	5	0	0	0
2018	2	14	6	0	0	0
2018	2	14	7	0.0551967	0	0
2018	2	14	8	16.1999	40.9973	53.4409
2018	2	14	9	119.425	126.588	222.465
2018	2	14	10	240.096	178.384	395.595
2018	2	14	11	67.5758	286.072	353.361
2018	2	14	12	231.909	287.285	526.429
2018	2	14	13	141.093	333.183	489.802
2018	2	14	14	58.1838	303.313	374.065
2018	2	14	15	72.7772	288.982	388.351
2018	2	14	16	54.6583	183.833	267.411
2018	2	14	17	10.8207	73.0754	127.758
2018	2	14	18	0	5.72849	7.9208
2018	2	14	19	0	0	0
2018	2	14	20	0	0	0
2018	2	14	21	0	0	0
2018	2	14	22	0	0	0
2018	2	14	23	0	0	0
2018	2	15	0	0	0	0
2018	2	15	1	0	0	0
2018	2	15	2	0	0	0
2018	2	15	3	0	0	0
2018	2	15	4	0	0	0
2018	2	15	5	0	0	0
2018	2	15	6	0	0	0
2018	2	15	7	0.0513244	0	0
2018	2	15	8	1.46104	32.3441	33.7429
2018	2	15	9	62.9761	142.853	196.579
2018	2	15	10	221.828	197.489	399.029
2018	2	15	11	89.6424	293.045	380.953
2018	2	15	12	28.6437	306.561	337.569
2018	2	15	13	36.7527	325.735	367.382
2018	2	15	14	133.919	262.37	421.565
2018	2	15	15	98.0014	224.473	355.911
2018	2	15	16	10.161	124.045	143.907
2018	2	15	17	3.94883	100.662	120.198
2018	2	15	18	0	6.43757	6.59143
2018	2	15	19	0	0	0
2018	2	15	20	0	0	0
2018	2	15	21	0	0	0
2018	2	15	22	0	0	0
2018	2	15	23	0	0	0
2018	2	16	0	0	0	0
2018	2	16	1	0	0	0
2018	2	16	2	0	0	0
2018	2	16	3	0	0	0
2018	2	16	4	0	0	0
2018	2	16	5	0	0	0
2018	2	16	6	0	0	0
2018	2	16	7	0.084688	0	0
2018	2	16	8	0.65858	38.7279	39.5828
2018	2	16	9	9.44406	141.595	149.83
2018	2	16	10	85.4442	283.454	367.083
2018	2	16	11	249.618	293.517	539.746
2018	2	16	12	54.5233	354.399	413.216
2018	2	16	13	251.274	307.938	585.645
2018	2	16	14	276.109	259.656	587.791
2018	2	16	15	158.421	211.129	417.834
2018	2	16	16	109.438	130.746	312.256
2018	2	16	17	11.4691	75.7669	130.314
2018	2	16	18	0	7.76183	9.01197
2018	2	16	19	0	0	0
2018	2	16	20	0	0	0
2018	2	16	21	0	0	0
2018	2	16	22	0	0	0
2018	2	16	23	0	0	0
2018	2	17	0	0	0	0
2018	2	17	1	0	0	0
2018	2	17	2	0	0	0
2018	2	17	3	0	0	0
2018	2	17	4	0	0	0
2018	2	17	5	0	0	0
2018	2	17	6	0	0	0
2018	2	17	7	0.0741753	0	0
2018	2	17	8	19.9053	40.7757	56.2278
2018	2	17	9	148.82	105.959	229.512
2018	2	17	10	203.861	214.027	395.873
2018	2	17	11	305.859	243.441	540.522
2018	2	17	12	278.604	304.372	594.083
2018	2	17	13	219.174	295.755	538.608
2018	2	17	14	137.829	194.643	362.921
2018	2	17	15	0.863257	75.044	75.8659
2018	2	17	16	25.9049	174.297	213.617
2018	2	17	17	1.86024	93.3482	102.142
2018	2	17	18	0	8.86631	9.70947
2018	2	17	19	0	0	0
2018	2	17	20	0	0	0
2018	2	17	21	0	0	0
2018	2	17	22	0	0	0
2018	2	17	23	0	0	0
2018	2	18	0	0	0	0
2018	2	18	1	0	0	0
2018	2	18	2	0	0	0
2018	2	18	3	0	0	0
2018	2	18	4	0	0	0
2018	2	18	5	0	0	0
2018	2	18	6	0	0	0
2018	2	18	7	0.0904069	0	0
2018	2	18	8	4.37399	57.1562	61.2758
2018	2	18	9	48.487	173.769	212.549
2018	2	18	10	96.8657	212.136	307.821
2018	2	18	11	241.535	269.517	509.457
2018	2	18	12	168.841	352.42	535.889
2018	2	18	13	157.166	369.907	554.478
2018	2	18	14	166.665	321.414	532.852
2018	2	18	15	126.41	262.202	440.915
2018	2	18	16	63.9491	191.448	304.104
2018	2	18	17	4.04934	106.449	125.423
2018	2	18	18	0	8.87942	9.35795
2018	2	18	19	0	0	0
2018	2	18	20	0	0	0
2018	2	18	21	0	0	0
2018	2	18	22	0	0	0
2018	2	18	23	0	0	0
2018	2	19	0	0	0	0
2018	2	19	1	0	0	0
2018	2	19	2	0	0	0
2018	2	19	3	0	0	0
2018	2	19	4	0	0	0
2018	2	19	5	0	0	0
2018	2	19	6	0	0	0
2018	2	19	7	0.0790434	0	0
2018	2	19	8	2.16569	41.617	44.0823
2018	2	19	9	96.1603	139.09	224.629
2018	2	19	10	125.323	238.879	356.809
2018	2	19	11	60.5647	346.85	412.483
2018	2	19	12	194.9	359.187	577.147
2018	2	19	13	170.593	338.872	541.929
2018	2	19	14	10.4447	326.521	340.486
2018	2	19	15	71.9628	303.086	402.588
2018	2	19	16	61.7696	193.863	303.178
2018	2	19	17	9.46651	97.3171	137.801
2018	2	19	18	0	12.058	13.2774
2018	2	19	19	0	0	0
2018	2	19	20	0	0	0
2018	2	19	21	0	0	0
2018	2	19	22	0	0	0
2018	2	19	23	0	0	0
2018	2	20	0	0	0	0
2018	2	20	1	0	0	0
2018	2	20	2	0	0	0
2018	2	20	3	0	0	0
2018	2	20	4	0	0	0
2018	2	20	5	0	0	0
2018	2	20	6	0	0	0
2018	2	20	7	0.107193	0	0
2018	2	20	8	24.9148	53.1615	73.5836
2018	2	20	9	139.934	121.166	246.593
2018	2	20	10	263.563	160.81	420.654
2018	2	20	11	352.381	183.674	555.983
2018	2	20	12	390.918	193.731	631.341
2018	2	20	13	347.307	219.5	632.09
2018	2	20	14	207.291	261.908	527.898
2018	2	20	15	74.129	213.184	321.89
2018	2	20	16	49.051	143.147	221.45
2018	2	20	17	14.8018	99.5005	158.295
2018	2	20	18	0	20.3574	22.3549
2018	2	20	19	0	0	0
2018	2	20	20	0	0	0
2018	2	20	21	0	0	0
2018	2	20	22	0	0	0
2018	2	20	23	0	0	0
2018	2	21	0	0	0	0
2018	2	21	1	0	0	0
2018	2	21	2	0	0	0
2018	2	21	3	0	0	0
2018	2	21	4	0	0	0
2018	2	21	5	0	0	0
2018	2	21	6	0	0	0
2018	2	21	7	0.108002	0	0
2018	2	21	8	21.8853	51.3417	69.4127
2018	2	21	9	132.304	130.608	245.715
2018	2	21	10	238.514	180.068	415.555
2018	2	21	11	319.32	210.704	550.829
2018	2	21	12	353.111	226.975	627.354
2018	2	21	13	340.17	231.914	641.401
2018	2	21	14	290.433	220.845	595.868
2018	2	21	15	199.985	201.798	487.402
2018	2	21	16	87.0378	155.003	307.361
2018	2	21	17	6.46453	87.2205	110.7
2018	2	21	18	0	13.7481	14.1532
2018	2	21	19	0	0	0
2018	2	21	20	0	0	0
2018	2	21	21	0	0	0
2018	2	21	22	0	0	0
2018	2	21	23	0	0	0
2018	2	22	0	0	0	0
2018	2	22	1	0	0	0
2018	2	22	2	0	0	0
2018	2	22	3	0	0	0
2018	2	22	4	0	0	0
2018	2	22	5	0	0	0
2018	2	22	6	0	0	0
2018	2	22	7	0.118289	0	0
2018	2	22	8	0.364438	35.45	35.7526
2018	2	22	9	1.69261	111.943	114.178
2018	2	22	10	95.1399	244.541	344.438
2018	2	22	11	162.94	335.95	510.54
2018	2	22	12	226.085	335.05	593.231
2018	2	22	13	253.026	308.391	614.261
2018	2	22	14	210.532	290.618	563.753
2018	2	22	15	140.891	252.561	454.889
2018	2	22	16	66.7366	189.622	305.715
2018	2	22	17	7.47384	106.805	134.542
2018	2	22	18	0	13.8875	14.3672
2018	2	22	19	0	0	0
2018	2	22	20	0	0	0
2018	2	22	21	0	0	0
2018	2	22	22	0	0	0
2018	2	22	23	0	0	0
2018	2	23	0	0	0	0
2018	2	23	1	0	0	0
2018	2	23	2	0	0	0
2018	2	23	3	0	0	0
2018	2	23	4	0	0	0
2018	2	23	5	0	0	0
2018	2	23	6	0	0	0
2018	2	23	7	0.121977	0	0
2018	2	23	8	20.8828	63.441	81.0449
2018	2	23	9	125.666	139.414	251.508
2018	2	23	10	243.661	181.335	425.483
2018	2	23	11	324.62	211.749	560.491
2018	2	23	12	347.307	234.366	630.565
2018	2	23	13	333.873	243.532	647.164
2018	2	23	14	263.467	250.628	592.51
2018	2	23	15	179.54	233.7	491.07
2018	2	23	16	92.252	176.39	334.815
2018	2	23	17	10.5005	105.803	144.29
2018	2	23	18	0	12.3069	12.7317
2018	2	23	19	0	0	0
2018	2	23	20	0	0	0
2018	2	23	21	0	0	0
2018	2	23	22	0	0	0
2018	2	23	23	0	0	0
2018	2	24	0	0	0	0
2018	2	24	1	0	0	0
2018	2	24	2	0	0	0
2018	2	24	3	0	0	0
2018	2	24	4	0	0	0
2018	2	24	5	0	0	0
2018	2	24	6	0	0	0
2018	2	24	7	0.126938	0	0
2018	2	24	8	20.4228	66.3459	83.7208
2018	2	24	9	115.86	151.415	255.925
2018	2	24	10	204.524	217.254	424.225
2018	2	24	11	247.589	255.466	522.176
2018	2	24	12	309.28	277.62	630.454
2018	2	24	13	325.814	261.908	655.683
2018	2	24	14	283.418	241.972	609.332
2018	2	24	15	205.252	207.09	501.199
2018	2	24	16	85.6717	169.615	319.316
2018	2	24	17	4.62292	94.7298	112.321
2018	2	24	18	0	14.0743	14.1035
2018	2	24	19	0	0	0
2018	2	24	20	0	0	0
2018	2	24	21	0	0	0
2018	2	24	22	0	0	0
2018	2	24	23	0	0	0
2018	2	25	0	0	0	0
2018	2	25	1	0	0	0
2018	2	25	2	0	0	0
2018	2	25	3	0	0	0
2018	2	25	4	0	0	0
2018	2	25	5	0	0	0
2018	2	25	6	0	0	0
2018	2	25	7	0.143712	1.12101	1.46559
2018	2	25	8	29.7086	79.0619	103.977
2018	2	25	9	141.045	144.431	272.185
2018	2	25	10	222.44	184.482	408.168
2018	2	25	11	270.218	265.366	557.141
2018	2	25	12	181.627	367.411	574.928
2018	2	25	13	156.659	412.926	603.751
2018	2	25	14	115.755	347.352	499.25
2018	2	25	15	81.2497	278.464	394.973
2018	2	25	16	36.0494	174.294	238.542
2018	2	25	17	2.56564	83.829	93.282
2018	2	25	18	0	10.9291	10.9578
2018	2	25	19	0	0	0
2018	2	25	20	0	0	0
2018	2	25	21	0	0	0
2018	2	25	22	0	0	0
2018	2	25	23	0	0	0
2018	2	26	0	0	0	0
2018	2	26	1	0	0	0
2018	2	26	2	0	0	0
2018	2	26	3	0	0	0
2018	2	26	4	0	0	0
2018	2	26	5	0	0	0
2018	2	26	6	0	0	0
2018	2	26	7	0.178142	0	0.0828909
2018	2	26	8	22.2306	69.7519	88.7762
2018	2	26	9	116.995	153.567	262.269
2018	2	26	10	229.333	202.983	439.192
2018	2	26	11	319.117	225	575.188
2018	2	26	12	360.888	234.384	653.23
2018	2	26	13	358.622	229.935	669.784
2018	2	26	14	308.894	216.673	620.02
2018	2	26	15	219.129	195.696	510.684
2018	2	26	16	112.107	162.05	353.786
2018	2	26	17	19.6769	100.714	163.866
2018	2	26	18	0	14.2226	15.4391
2018	2	26	19	0	0	0
2018	2	26	20	0	0	0
2018	2	26	21	0	0	0
2018	2	26	22	0	0	0
2018	2	26	23	0	0	0
2018	2	27	0	0	0	0
2018	2	27	1	0	0	0
2018	2	27	2	0	0	0
2018	2	27	3	0	0	0
2018	2	27	4	0	0	0
2018	2	27	5	0	0	0
2018	2	27	6	0	0	0
2018	2	27	7	0.143146	1.27505	1.5752
2018	2	27	8	4.89083	65.0276	69.9849
2018	2	27	9	132.535	135.721	260.171
2018	2	27	10	264.807	174.079	445.348
2018	2	27	11	234.155	235.767	487.746
2018	2	27	12	235.521	305.701	578.185
2018	2	27	13	264.346	299.368	622.388
2018	2	27	14	172.157	296.222	523.337
2018	2	27	15	41.0007	278.687	340.281
2018	2	27	16	9.55108	194.239	209.873
2018	2	27	17	0.833533	103.787	106.784
2018	2	27	18	0	26.8423	28.5114
2018	2	27	19	0	0	0
2018	2	27	20	0	0	0
2018	2	27	21	0	0	0
2018	2	27	22	0	0	0
2018	2	27	23	0	0	0
2018	2	28	0	0	0	0
2018	2	28	1	0	0	0
2018	2	28	2	0	0	0
2018	2	28	3	0	0	0
2018	2	28	4	0	0	0
2018	2	28	5	0	0	0
2018	2	28	6	0	0	0
2018	2	28	7	0.195879	0	0
2018	2	28	8	34.4384	62.001	92.3527
2018	2	28	9	63.1084	155.318	209.442
2018	2	28	10	114.025	185.101	302.684
2018	2	28	11	272.572	207.808	512.91
2018	2	28	12	441.345	159.884	670.226
2018	2	28	13	371.932	198.793	654.115
2018	2	28	14	363.548	164.87	639.087
2018	2	28	15	274.184	150.226	543.317
2018	2	28	16	151.315	127.886	384.25
2018	2	28	17	35.7338	81.6905	187.642
2018	2	28	18	0	20.3449	28.6755
2018	2	28	19	0	0	0
2018	2	28	20	0	0	0
2018	2	28	21	0	0	0
2018	2	28	22	0	0	0
2018	2	28	23	0	0	0
2018	3	1	0	0	0	0
2018	3	1	1	0	0	0
2018	3	1	2	0	0	0
2018	3	1	3	0	0	0
2018	3	1	4	0	0	0
2018	3	1	5	0	0	0
2018	3	1	6	0	0	0
2018	3	1	7	0.342242	3.14049	3.61111
2018	3	1	8	48.8362	71.452	112.131
2018	3	1	9	183.013	129.311	298.678
2018	3	1	10	291.513	171.459	470.864
2018	3	1	11	351.978	201.7	587.096
2018	3	1	12	418.533	194.695	678.556
2018	3	1	13	410.729	192.321	693.899
2018	3	1	14	353.084	188.724	648.686
2018	3	1	15	257.968	167.739	536.791
2018	3	1	16	136.246	146.484	376.774
2018	3	1	17	30.9542	97.8099	187.14
2018	3	1	18	0	21.7488	27.6024
2018	3	1	19	0	0	0
2018	3	1	20	0	0	0
2018	3	1	21	0	0	0
2018	3	1	22	0	0	0
2018	3	1	23	0	0	0
2018	3	2	0	0	0	0
2018	3	2	1	0	0	0
2018	3	2	2	0	0	0
2018	3	2	3	0	0	0
2018	3	2	4	0	0	0
2018	3	2	5	0	0	0
2018	3	2	6	0	0	0
2018	3	2	7	0.694511	2.38622	3.0851
2018	3	2	8	67.9998	64.1105	120.275
2018	3	2	9	198.463	124.528	307.844
2018	3	2	10	279.772	189.779	478.065
2018	3	2	11	108.106	340.798	456.477
2018	3	2	12	132.71	389.411	544.255
2018	3	2	13	137.419	336.267	504.555
2018	3	2	14	59.1592	339.673	418.927
2018	3	2	15	16.5248	284.827	309.973
2018	3	2	16	0.758714	156.476	157.671
2018	3	2	17	0.226516	79.4706	79.8976
2018	3	2	18	0	14.2418	14.1315
2018	3	2	19	0	0	0
2018	3	2	20	0	0	0
2018	3	2	21	0	0	0
2018	3	2	22	0	0	0
2018	3	2	23	0	0	0
2018	3	3	0	0	0	0
2018	3	3	1	0	0	0
2018	3	3	2	0	0	0
2018	3	3	3	0	0	0
2018	3	3	4	0	0	0
2018	3	3	5	0	0	0
2018	3	3	6	0	0	0
2018	3	3	7	0.174077	3.50941	4.01772
2018	3	3	8	13.2422	70.9751	83.8117
2018	3	3	9	60.3157	191.85	246.539
2018	3	3	10	20.2879	305.443	327.218
2018	3	3	11	10.3477	320.814	333.134
2018	3	3	12	3.51516	252.981	256.991
2018	3	3	13	1.98969	212.291	214.542
2018	3	3	14	1.971	225.642	228.099
2018	3	3	15	1.64507	182.899	184.831
2018	3	3	16	0.63556	92.615	93.3604
2018	3	3	17	0.229186	58.2449	58.773
2018	3	3	18	0	11.5023	11.8591
2018	3	3	19	0	0	0
2018	3	3	20	0	0	0
2018	3	3	21	0	0	0
2018	3	3	22	0	0	0
2018	3	3	23	0	0	0
2018	3	4	0	0	0	0
2018	3	4	1	0	0	0
2018	3	4	2	0	0	0
2018	3	4	3	0	0	0
2018	3	4	4	0	0	0
2018	3	4	5	0	0	0
2018	3	4	6	0	0	0
2018	3	4	7	0.270763	3.57513	4.041
2018	3	4	8	26.2275	87.7334	119.316
2018	3	4	9	114.397	164.102	303.449
2018	3	4	10	185.461	218.281	456.397
2018	3	4	11	240.939	247.336	572.194
2018	3	4	12	272.345	259.104	644.081
2018	3	4	13	252.262	276.182	652.432
2018	3	4	14	199.177	282.744	601.058
2018	3	4	15	123.497	260.49	479.799
2018	3	4	16	62.2341	214.954	348.739
2018	3	4	17	9.99569	129.251	166.013
2018	3	4	18	0	24.1925	25.0463
2018	3	4	19	0	0	0
2018	3	4	20	0	0	0
2018	3	4	21	0	0	0
2018	3	4	22	0	0	0
2018	3	4	23	0	0	0
2018	3	5	0	0	0	0
2018	3	5	1	0	0	0
2018	3	5	2	0	0	0
2018	3	5	3	0	0	0
2018	3	5	4	0	0	0
2018	3	5	5	0	0	0
2018	3	5	6	0	0	0
2018	3	5	7	0.190599	8.16515	8.50785
2018	3	5	8	2.41967	87.3062	90.7327
2018	3	5	9	26.5016	207.52	241.229
2018	3	5	10	62.1076	308.84	391.695
2018	3	5	11	80.5154	387.492	502.429
2018	3	5	12	93.2501	434.027	575.471
2018	3	5	13	104.72	432.471	599.911
2018	3	5	14	96.6105	400.413	564.267
2018	3	5	15	65.0587	341.627	462.097
2018	3	5	16	31.2474	255.514	322.562
2018	3	5	17	5.46145	140.298	159.527
2018	3	5	18	0	24.6781	25.3037
2018	3	5	19	0	0	0
2018	3	5	20	0	0	0
2018	3	5	21	0	0	0
2018	3	5	22	0	0	0
2018	3	5	23	0	0	0
2018	3	6	0	0	0	0
2018	3	6	1	0	0	0
2018	3	6	2	0	0	0
2018	3	6	3	0	0	0
2018	3	6	4	0	0	0
2018	3	6	5	0	0	0
2018	3	6	6	0	0	0
2018	3	6	7	0.214613	5.67727	6.00304
2018	3	6	8	1.15033	87.7053	89.4653
2018	3	6	9	8.27184	211.042	222.326
2018	3	6	10	23.4659	329.962	362.774
2018	3	6	11	34.6561	415.895	466.906
2018	3	6	12	44.8668	468.649	538.898
2018	3	6	13	45.782	474.503	550.186
2018	3	6	14	39.4041	435.576	504.611
2018	3	6	15	18.0004	358.878	393.177
2018	3	6	16	7.79669	261.983	278.903
2018	3	6	17	0.795019	129.081	132.003
2018	3	6	18	0	22.5683	22.7651
2018	3	6	19	0	0	0
2018	3	6	20	0	0	0
2018	3	6	21	0	0	0
2018	3	6	22	0	0	0
2018	3	6	23	0	0	0
2018	3	7	0	0	0	0
2018	3	7	1	0	0	0
2018	3	7	2	0	0	0
2018	3	7	3	0	0	0
2018	3	7	4	0	0	0
2018	3	7	5	0	0	0
2018	3	7	6	0	0	0
2018	3	7	7	0.216054	8.95069	9.31574
2018	3	7	8	0.837885	79.3914	80.7174
2018	3	7	9	9.03072	215.988	228.564
2018	3	7	10	32.2476	338.744	384.209
2018	3	7	11	56.0955	421.668	504.905
2018	3	7	12	72.4536	465.474	579.114
2018	3	7	13	67.1444	473.199	584.402
2018	3	7	14	54.9491	441.232	538.133
2018	3	7	15	36.4241	369.634	439.203
2018	3	7	16	15.0862	265.401	299.065
2018	3	7	17	1.39843	129.528	134.526
2018	3	7	18	0	28.2098	28.528
2018	3	7	19	0	0	0
2018	3	7	20	0	0	0
2018	3	7	21	0	0	0
2018	3	7	22	0	0	0
2018	3	7	23	0	0	0
2018	3	8	0	0	0	0
2018	3	8	1	0	0	0
2018	3	8	2	0	0	0
2018	3	8	3	0	0	0
2018	3	8	4	0	0	0
2018	3	8	5	0	0	0
2018	3	8	6	0	0	0
2018	3	8	7	0.216028	5.95564	6.25535
2018	3	8	8	0.969039	93.6803	95.3455
2018	3	8	9	5.63123	216.025	223.821
2018	3	8	10	16.5941	373.546	396.819
2018	3	8	11	29.6506	442.806	486.792
2018	3	8	12	34.5321	466.918	520.09
2018	3	8	13	46.4341	498.244	573.861
2018	3	8	14	33.5326	449.953	507.898
2018	3	8	15	18.7843	360.305	395.536
2018	3	8	16	3.35948	220.038	226.817
2018	3	8	17	0.38437	110.021	111.032
2018	3	8	18	0	24.1976	24.4873
2018	3	8	19	0	0	0
2018	3	8	20	0	0	0
2018	3	8	21	0	0	0
2018	3	8	22	0	0	0
2018	3	8	23	0	0	0
2018	3	9	0	0	0	0
2018	3	9	1	0	0	0
2018	3	9	2	0	0	0
2018	3	9	3	0	0	0
2018	3	9	4	0	0	0
2018	3	9	5	0	0	0
2018	3	9	6	0	0	0
2018	3	9	7	0.220515	8.62	8.95078
2018	3	9	8	1.69592	99.8801	102.514
2018	3	9	9	17.206	235.42	259.219
2018	3	9	10	44.1079	349.605	412.259
2018	3	9	11	53.3848	427.905	507.245
2018	3	9	12	60.107	468.065	561.429
2018	3	9	13	61.4985	480.288	581.928
2018	3	9	14	49.5619	450.158	537.23
2018	3	9	15	33.628	378.241	442.79
2018	3	9	16	13.9582	278.237	309.223
2018	3	9	17	1.69544	142.137	147.79
2018	3	9	18	0	27.366	27.5247
2018	3	9	19	0	0	0
2018	3	9	20	0	0	0
2018	3	9	21	0	0	0
2018	3	9	22	0	0	0
2018	3	9	23	0	0	0
2018	3	10	0	0	0	0
2018	3	10	1	0	0	0
2018	3	10	2	0	0	0
2018	3	10	3	0	0	0
2018	3	10	4	0	0	0
2018	3	10	5	0	0	0
2018	3	10	6	0	0	0
2018	3	10	7	0.236142	8.00046	8.40067
2018	3	10	8	1.1278	81.5431	83.2422
2018	3	10	9	10.2251	233.141	247.821
2018	3	10	10	27.6416	335.346	374.671
2018	3	10	11	59.2708	399.679	488.842
2018	3	10	12	76.7226	436.574	555.027
2018	3	10	13	30.9559	400.081	449.485
2018	3	10	14	30.501	396.828	449.242
2018	3	10	15	2.69967	187.755	192.002
2018	3	10	16	2.20875	203.118	207.432
2018	3	10	17	1.94022	165.239	171.82
2018	3	10	18	0	30.9174	31.1477
2018	3	10	19	0	0	0
2018	3	10	20	0	0	0
2018	3	10	21	0	0	0
2018	3	10	22	0	0	0
2018	3	10	23	0	0	0
2018	3	11	0	0	0	0
2018	3	11	1	0	0	0
2018	3	11	2	0	0	0
2018	3	11	3	0	0	0
2018	3	11	4	0	0	0
2018	3	11	5	0	0	0
2018	3	11	6	0	0	0
2018	3	11	7	0.284901	14.2767	14.7113
2018	3	11	8	13.9844	119.698	138.376
2018	3	11	9	65.4667	233.14	323.535
2018	3	11	10	131.845	306.267	498.342
2018	3	11	11	168.447	360.928	615.064
2018	3	11	12	193.853	379.805	684.058
2018	3	11	13	219.277	349.474	708.08
2018	3	11	14	199.015	318.073	663.945
2018	3	11	15	142.622	286.812	558.971
2018	3	11	16	74.0196	233.65	397.616
2018	3	11	17	18.0118	149.251	209.497
2018	3	11	18	0	29.8955	32.7898
2018	3	11	19	0	0	0
2018	3	11	20	0	0	0
2018	3	11	21	0	0	0
2018	3	11	22	0	0	0
2018	3	11	23	0	0	0
2018	3	12	0	0	0	0
2018	3	12	1	0	0	0
2018	3	12	2	0	0	0
2018	3	12	3	0	0	0
2018	3	12	4	0	0	0
2018	3	12	5	0	0	0
2018	3	12	6	0	0	0
2018	3	12	7	0.48894	21.149	21.9634
2018	3	12	8	13.8013	125.182	143.482
2018	3	12	9	64.616	230.003	319.485
2018	3	12	10	107.726	318.166	473.919
2018	3	12	11	86.4682	413.355	540.729
2018	3	12	12	82.8005	439.825	568.572
2018	3	12	13	57.4313	444.569	537.633
2018	3	12	14	31.0273	416.886	469.721
2018	3	12	15	16.9385	334.686	366.181
2018	3	12	16	31.0087	286.161	354.43
2018	3	12	17	9.6999	172.632	205.335
2018	3	12	18	0	26.6607	27.0961
2018	3	12	19	0	0	0
2018	3	12	20	0	0	0
2018	3	12	21	0	0	0
2018	3	12	22	0	0	0
2018	3	12	23	0	0	0
2018	3	13	0	0	0	0
2018	3	13	1	0	0	0
2018	3	13	2	0	0	0
2018	3	13	3	0	0	0
2018	3	13	4	0	0	0
2018	3	13	5	0	0	0
2018	3	13	6	0	0	0
2018	3	13	7	0.24603	12.8098	13.1749
2018	3	13	8	1.21411	98.1467	99.7279
2018	3	13	9	1.79258	177.122	179.868
2018	3	13	10	5.88253	266.495	275.32
2018	3	13	11	6.34657	320.485	329.464
2018	3	13	12	3.1711	304.072	308.23
2018	3	13	13	3.92156	324.534	330.35
2018	3	13	14	50.9033	401.979	491.003
2018	3	13	15	40.9876	359.985	438.055
2018	3	13	16	6.45675	219.998	234.496
2018	3	13	17	0.654448	121.83	123.785
2018	3	13	18	0	30.9264	31.2031
2018	3	13	19	0	0	0
2018	3	13	20	0	0	0
2018	3	13	21	0	0	0
2018	3	13	22	0	0	0
2018	3	13	23	0	0	0
2018	3	14	0	0	0	0
2018	3	14	1	0	0	0
2018	3	14	2	0	0	0
2018	3	14	3	0	0	0
2018	3	14	4	0	0	0
2018	3	14	5	0	0	0
2018	3	14	6	0	0	0
2018	3	14	7	0.246969	13.5791	13.9181
2018	3	14	8	0.914991	97.0342	98.3828
2018	3	14	9	14.1674	228.035	248.794
2018	3	14	10	31.3064	325.423	370.173
2018	3	14	11	86.1088	405.413	535.773
2018	3	14	12	48.2177	418.889	493.969
2018	3	14	13	91.2007	407.068	556.309
2018	3	14	14	36.0863	409.287	471.794
2018	3	14	15	70.1438	366.021	496.812
2018	3	14	16	33.805	266.036	342.118
2018	3	14	17	1.31178	132.44	136.376
2018	3	14	18	0	27.1804	27.6579
2018	3	14	19	0	0	0
2018	3	14	20	0	0	0
2018	3	14	21	0	0	0
2018	3	14	22	0	0	0
2018	3	14	23	0	0	0
2018	3	15	0	0	0	0
2018	3	15	1	0	0	0
2018	3	15	2	0	0	0
2018	3	15	3	0	0	0
2018	3	15	4	0	0	0
2018	3	15	5	0	0	0
2018	3	15	6	0	0	0
2018	3	15	7	0.275673	15.9364	16.3266
2018	3	15	8	0.560438	69.374	69.9219
2018	3	15	9	25.069	216.373	253.591
2018	3	15	10	89.4754	338.359	468.43
2018	3	15	11	122.616	378.226	564.175
2018	3	15	12	180.041	382.273	664.777
2018	3	15	13	137.008	440.688	664.081
2018	3	15	14	80.0746	457.526	594.777
2018	3	15	15	31.2045	313.135	373.511
2018	3	15	16	14.9675	271.261	303.612
2018	3	15	17	1.68964	129.954	135.084
2018	3	15	18	0	43.3592	43.8692
2018	3	15	19	0	0	0
2018	3	15	20	0	0	0
2018	3	15	21	0	0	0
2018	3	15	22	0	0	0
2018	3	15	23	0	0	0
2018	3	16	0	0	0	0
2018	3	16	1	0	0	0
2018	3	16	2	0	0	0
2018	3	16	3	0	0	0
2018	3	16	4	0	0	0
2018	3	16	5	0	0	0
2018	3	16	6	0	0	0
2018	3	16	7	0.280718	13.7495	14.1781
2018	3	16	8	0.561468	79.251	79.9205
2018	3	16	9	1.77124	206.521	208.945
2018	3	16	10	12.3654	303.927	322.482
2018	3	16	11	61.8696	436.117	529.575
2018	3	16	12	76.7044	473.412	592.917
2018	3	16	13	64.2415	486.089	591.233
2018	3	16	14	48.0012	452.788	536.093
2018	3	16	15	26.2249	375.427	425.254
2018	3	16	16	7.73305	266.562	283.149
2018	3	16	17	1.12074	146.42	149.697
2018	3	16	18	0	37.1157	37.5254
2018	3	16	19	0	0	0
2018	3	16	20	0	0	0
2018	3	16	21	0	0	0
2018	3	16	22	0	0	0
2018	3	16	23	0	0	0
2018	3	17	0	0	0	0
2018	3	17	1	0	0	0
2018	3	17	2	0	0	0
2018	3	17	3	0	0	0
2018	3	17	4	0	0	0
2018	3	17	5	0	0	0
2018	3	17	6	0	0	0
2018	3	17	7	0.270207	18.642	19.0039
2018	3	17	8	1.93187	121.427	124.458
2018	3	17	9	15.7774	259.344	282.012
2018	3	17	10	37.807	369.426	425.525
2018	3	17	11	50.0145	446.207	523.621
2018	3	17	12	36.6092	470.532	530.101
2018	3	17	13	11.2987	386.098	404.76
2018	3	17	14	6.09462	299.592	309.441
2018	3	17	15	5.47116	332.769	341.916
2018	3	17	16	1.41358	152.056	152.95
2018	3	17	17	0.356512	29.3644	29.4683
2018	3	17	18	0	39.0748	39.5118
2018	3	17	19	0	0	0
2018	3	17	20	0	0	0
2018	3	17	21	0	0	0
2018	3	17	22	0	0	0
2018	3	17	23	0	0	0
2018	3	18	0	0	0	0
2018	3	18	1	0	0	0
2018	3	18	2	0	0	0
2018	3	18	3	0	0	0
2018	3	18	4	0	0	0
2018	3	18	5	0	0	0
2018	3	18	6	0	0	0
2018	3	18	7	0.363682	22.8859	23.497
2018	3	18	8	7.83724	131.808	143.166
2018	3	18	9	60.5444	244.032	328.568
2018	3	18	10	155.006	298.808	515.515
2018	3	18	11	277.854	263.271	674.165
2018	3	18	12	393.814	176.53	799.399
2018	3	18	13	408.67	140.713	817.325
2018	3	18	14	342.985	156.41	755.194
2018	3	18	15	174.57	260.946	593.595
2018	3	18	16	67.6834	267.07	404.887
2018	3	18	17	13.4772	165.593	203.199
2018	3	18	18	0	50.5879	53.9978
2018	3	18	19	0	0	0
2018	3	18	20	0	0	0
2018	3	18	21	0	0	0
2018	3	18	22	0	0	0
2018	3	18	23	0	0	0
2018	3	19	0	0	0	0
2018	3	19	1	0	0	0
2018	3	19	2	0	0	0
2018	3	19	3	0	0	0
2018	3	19	4	0	0	0
2018	3	19	5	0	0	0
2018	3	19	6	0	0	0
2018	3	19	7	0.388658	20.8877	21.7843
2018	3	19	8	12.8404	135.893	152.189
2018	3	19	9	60.4436	249.953	330.573
2018	3	19	10	128.206	357.184	533.654
2018	3	19	11	141.007	431.191	633.675
2018	3	19	12	226.79	374.412	717.744
2018	3	19	13	223.62	386.31	740.732
2018	3	19	14	185.294	371.868	680.65
2018	3	19	15	138.929	322.113	571.151
2018	3	19	16	72.2485	257.607	402.858
2018	3	19	17	18.1725	167.066	217.94
2018	3	19	18	0	53.6367	57.7867
2018	3	19	19	0	0	0
2018	3	19	20	0	0	0
2018	3	19	21	0	0	0
2018	3	19	22	0	0	0
2018	3	19	23	0	0	0
2018	3	20	0	0	0	0
2018	3	20	1	0	0	0
2018	3	20	2	0	0	0
2018	3	20	3	0	0	0
2018	3	20	4	0	0	0
2018	3	20	5	0	0	0
2018	3	20	6	0	0	0
2018	3	20	7	0.769306	31.8721	33.4512
2018	3	20	8	17.0434	151.089	173.128
2018	3	20	9	47.8909	279.856	343.284
2018	3	20	10	52.896	376.384	450.711
2018	3	20	11	98.3904	438.307	582.866
2018	3	20	12	111.845	498.884	669.317
2018	3	20	13	59.8523	470.215	565.155
2018	3	20	14	69.9583	422.795	538.863
2018	3	20	15	91.854	370.255	536.095
2018	3	20	16	58.6447	278.946	398.333
2018	3	20	17	13.2304	177.71	214.04
2018	3	20	18	0	60.0702	63.1611
2018	3	20	19	0	0	0
2018	3	20	20	0	0	0
2018	3	20	21	0	0	0
2018	3	20	22	0	0	0
2018	3	20	23	0	0	0
2018	3	21	0	0	0	0
2018	3	21	1	0	0	0
2018	3	21	2	0	0	0
2018	3	21	3	0	0	0
2018	3	21	4	0	0	0
2018	3	21	5	0	0	0
2018	3	21	6	0	0	0
2018	3	21	7	1.30879	32.9668	35.3332
2018	3	21	8	28.5914	144.171	181.451
2018	3	21	9	90.0168	244.728	365.728
2018	3	21	10	154.654	315.067	533.473
2018	3	21	11	203.621	361.31	661.438
2018	3	21	12	218.191	392.57	727.393
2018	3	21	13	204.066	403.082	730.16
2018	3	21	14	172.217	387.61	677.657
2018	3	21	15	122.09	345.459	566.789
2018	3	21	16	62.6867	277.762	406.018
2018	3	21	17	14.6056	174.523	215.581
2018	3	21	18	0	56.7918	60.5282
2018	3	21	19	0	0	0
2018	3	21	20	0	0	0
2018	3	21	21	0	0	0
2018	3	21	22	0	0	0
2018	3	21	23	0	0	0
2018	3	22	0	0	0	0
2018	3	22	1	0	0	0
2018	3	22	2	0	0	0
2018	3	22	3	0	0	0
2018	3	22	4	0	0	0
2018	3	22	5	0	0	0
2018	3	22	6	0.00559916	0	0
2018	3	22	7	0.523619	33.6473	34.8656
2018	3	22	8	13.8942	151.562	170.821
2018	3	22	9	61.0696	267.633	351.175
2018	3	22	10	122.655	350.018	524.29
2018	3	22	11	171.646	392.638	646.286
2018	3	22	12	203.001	412.922	725.433
2018	3	22	13	198.925	414.665	733.629
2018	3	22	14	160.669	402.143	672.765
2018	3	22	15	106.483	365.842	558.491
2018	3	22	16	49.5258	294.317	395.094
2018	3	22	17	12.0249	184.94	217.998
2018	3	22	18	0.025954	57.9461	60.5956
2018	3	22	19	0	0	0
2018	3	22	20	0	0	0
2018	3	22	21	0	0	0
2018	3	22	22	0	0	0
2018	3	22	23	0	0	0
2018	3	23	0	0	0	0
2018	3	23	1	0	0	0
2018	3	23	2	0	0	0
2018	3	23	3	0	0	0
2018	3	23	4	0	0	0
2018	3	23	5	0	0	0
2018	3	23	6	0.011312	0	0
2018	3	23	7	0.837928	37.744	39.4562
2018	3	23	8	19.7646	155.777	182.537
2018	3	23	9	73.8782	265.378	365.592
2018	3	23	10	139.417	340.681	538.261
2018	3	23	11	188.422	386.774	664.024
2018	3	23	12	218.38	402.805	737.133
2018	3	23	13	229.096	389.607	755.484
2018	3	23	14	208.386	357.446	706.494
2018	3	23	15	158.921	312.435	598.348
2018	3	23	16	87.9283	254.386	432.564
2018	3	23	17	24.8467	172.009	238.677
2018	3	23	18	0.180776	67.2125	75.0705
2018	3	23	19	0	0	0
2018	3	23	20	0	0	0
2018	3	23	21	0	0	0
2018	3	23	22	0	0	0
2018	3	23	23	0	0	0
2018	3	24	0	0	0	0
2018	3	24	1	0	0	0
2018	3	24	2	0	0	0
2018	3	24	3	0	0	0
2018	3	24	4	0	0	0
2018	3	24	5	0	0	0
2018	3	24	6	0.0198924	0	0
2018	3	24	7	0.965677	35.4215	37.2999
2018	3	24	8	11.6098	143.355	158.512
2018	3	24	9	25.1943	255.023	290.572
2018	3	24	10	15.3884	319.312	341.722
2018	3	24	11	52.6971	419.747	495.74
2018	3	24	12	80.6861	401.24	525.661
2018	3	24	13	176.447	461.794	743.593
2018	3	24	14	140.709	419.63	656.65
2018	3	24	15	57.3623	385.618	489.873
2018	3	24	16	4.6549	254.713	263.67
2018	3	24	17	1.77661	147.639	152.188
2018	3	24	18	0.0274843	40.5148	40.9724
2018	3	24	19	0	0	0
2018	3	24	20	0	0	0
2018	3	24	21	0	0	0
2018	3	24	22	0	0	0
2018	3	24	23	0	0	0
2018	3	25	0	0	0	0
2018	3	25	1	0	0	0
2018	3	25	2	0	0	0
2018	3	25	3	0	0	0
2018	3	25	4	0	0	0
2018	3	25	5	0	0	0
2018	3	25	6	0.0321466	0	0
[truncated: 6,761 more rows]
